# Supplementary material for: Acute activation of adipocyte lipolysis reveals dynamic lipid remodeling of the hepatic lipidome
Source: PubMed Central journal article supplement (PMC10839691; doi:10.1016/j.jlr.2023.100434), 2023-08-26

**Supplemental Figure 1. The concentration of specific lipid species in serum after 30 minutes of CL administration.**

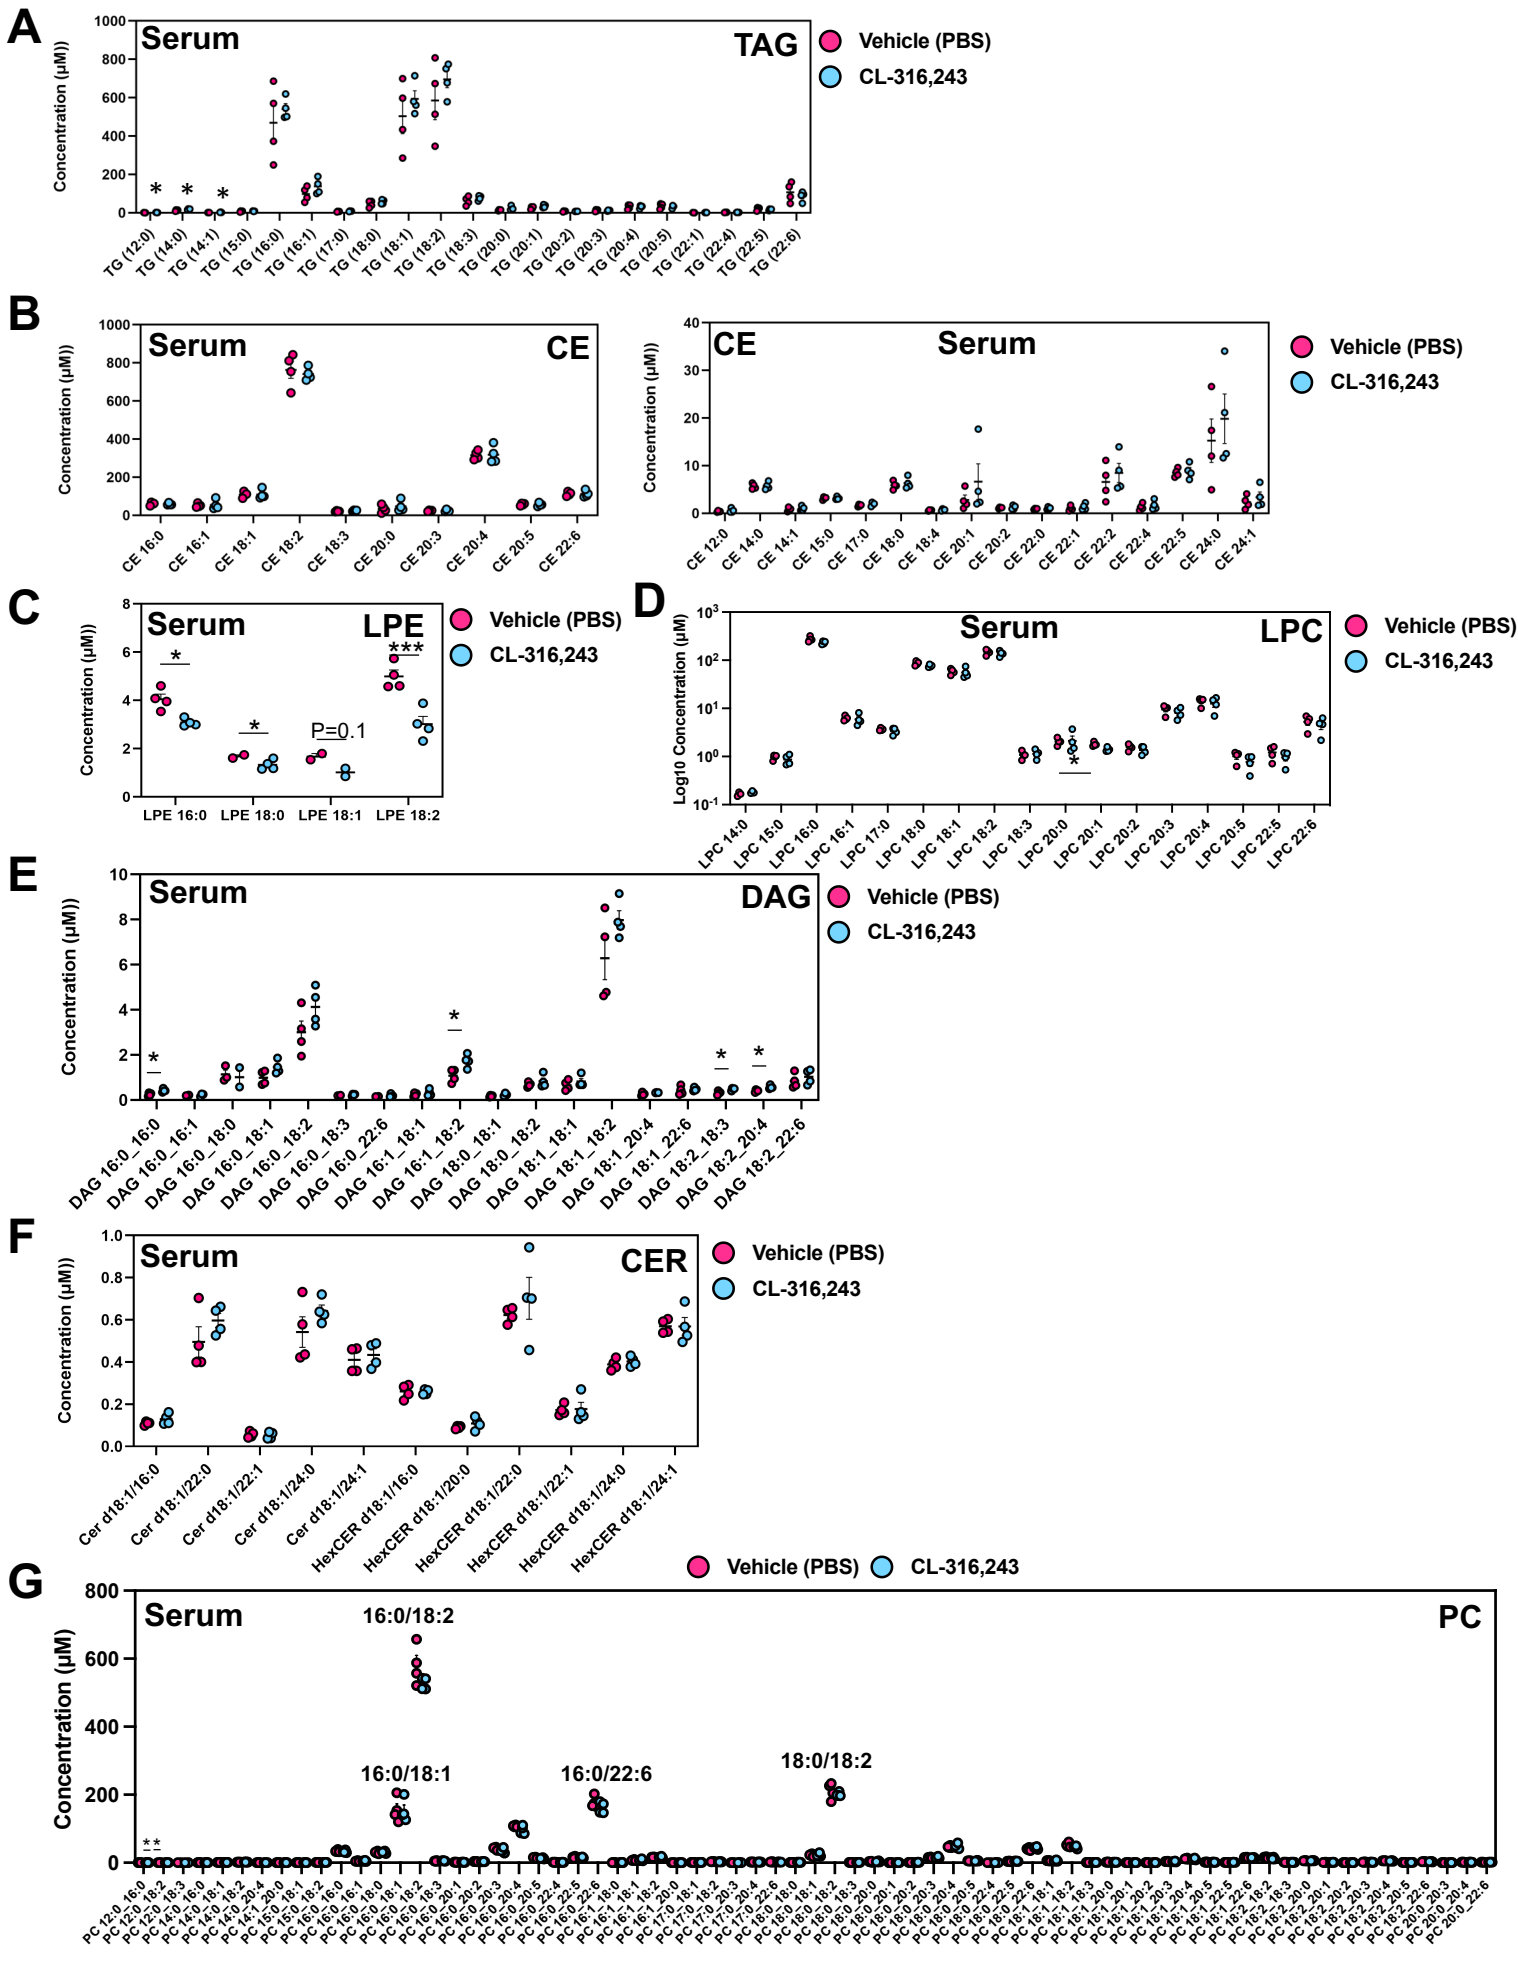

Supplement Figure 1. The concentration of specific lipid species in serum after 30 mins of CL administration.

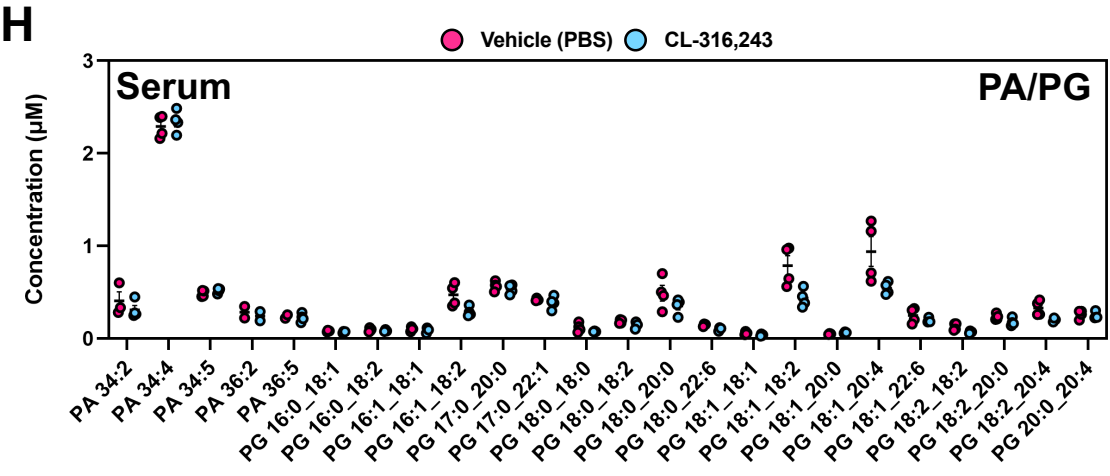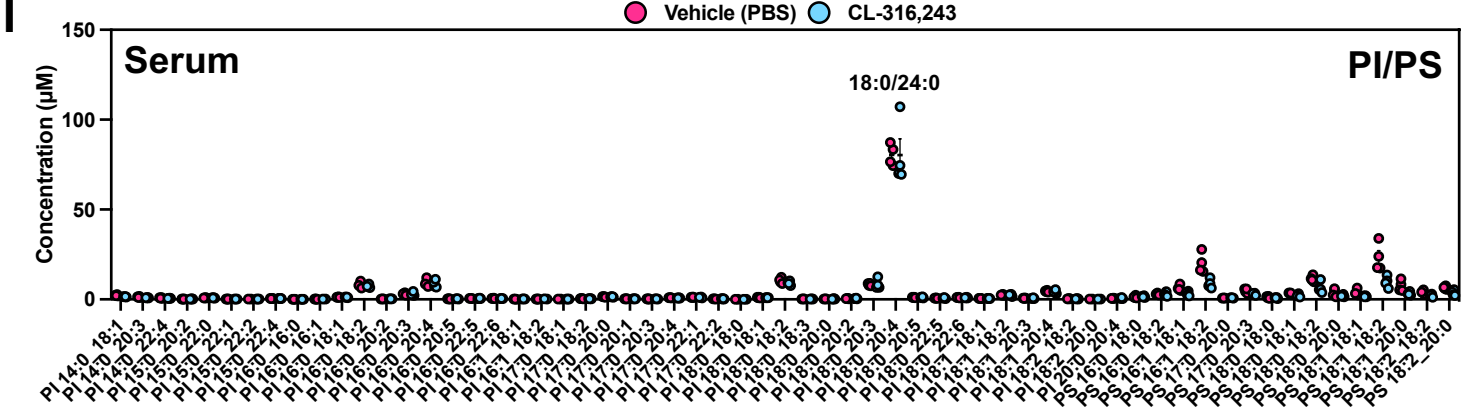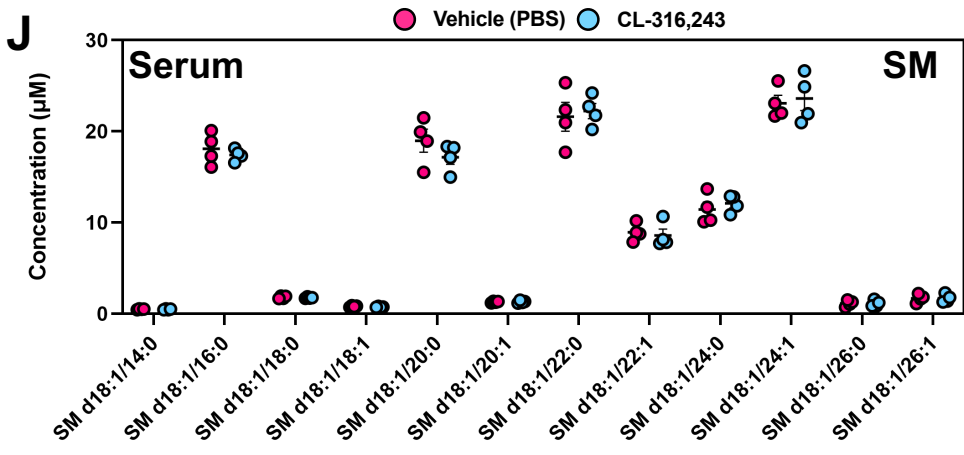

Supplement: mmc1.pdf [file mmc1.pdf]
