# Supplementary material for: Acute activation of adipocyte lipolysis reveals dynamic lipid remodeling of the hepatic lipidome
Source: PubMed Central journal article supplement (PMC10839691; doi:10.1016/j.jlr.2023.100434), 2023-08-26

Supplement Figure 2. Serum and liver metabolites after 30 minutes of CL-316,243 administration.

**A**

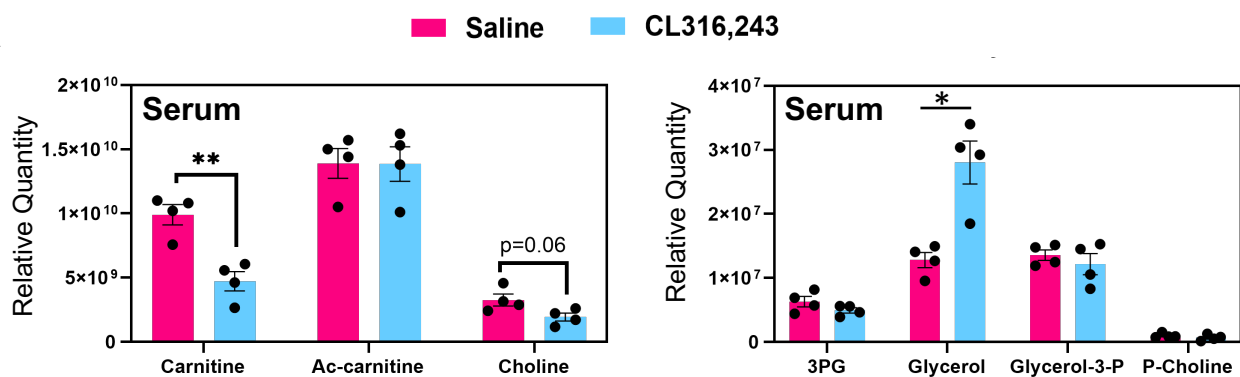

**B**

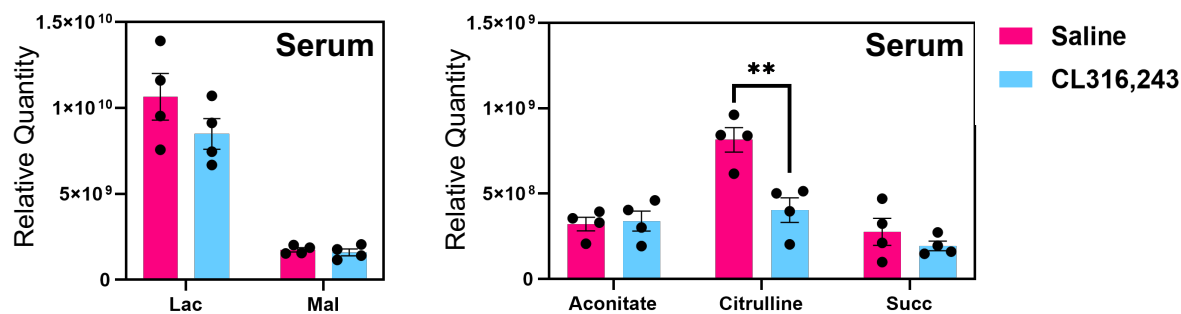

**C**

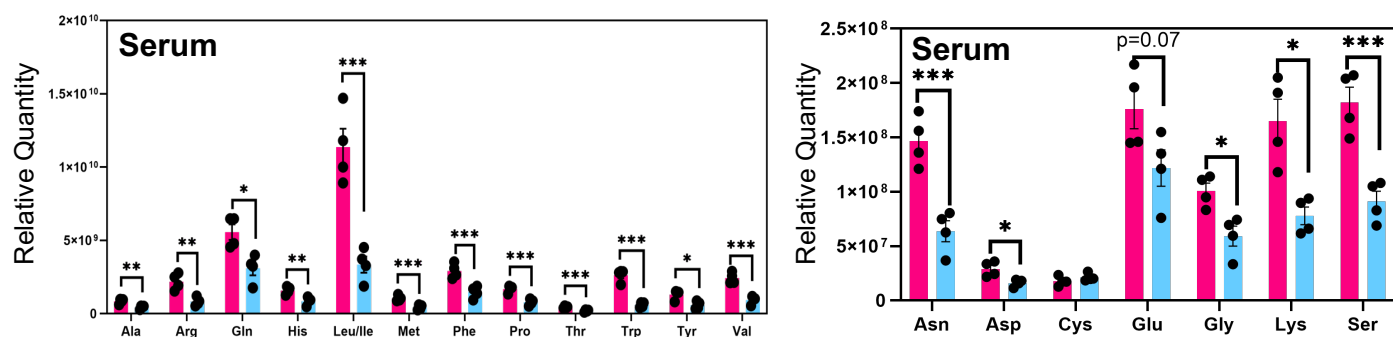

**D**

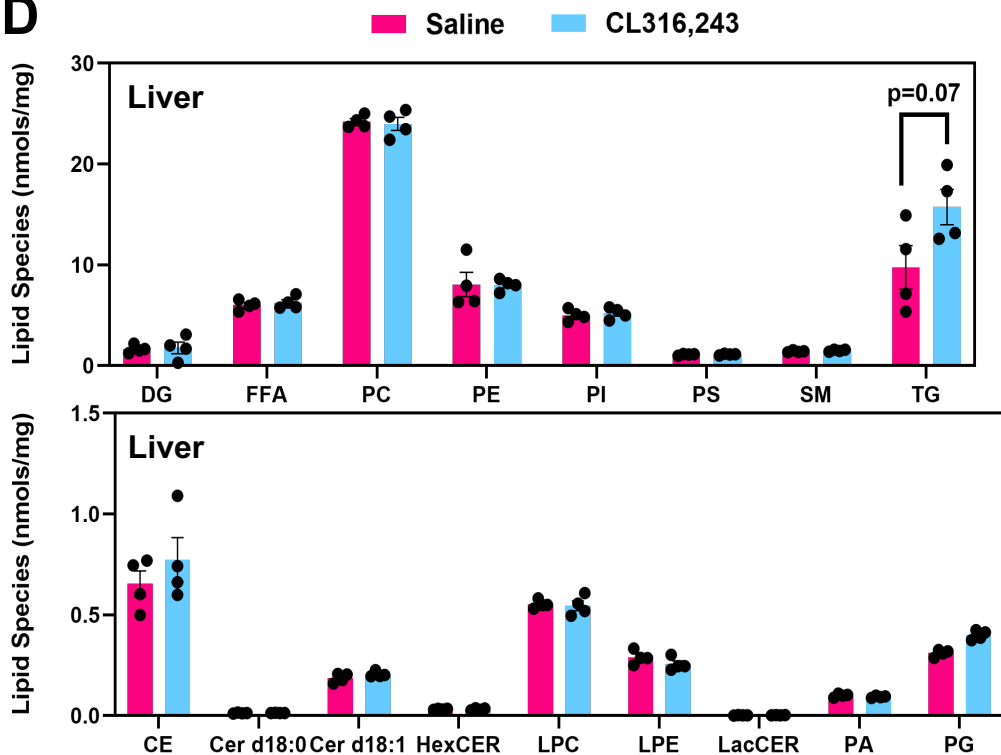

**E**

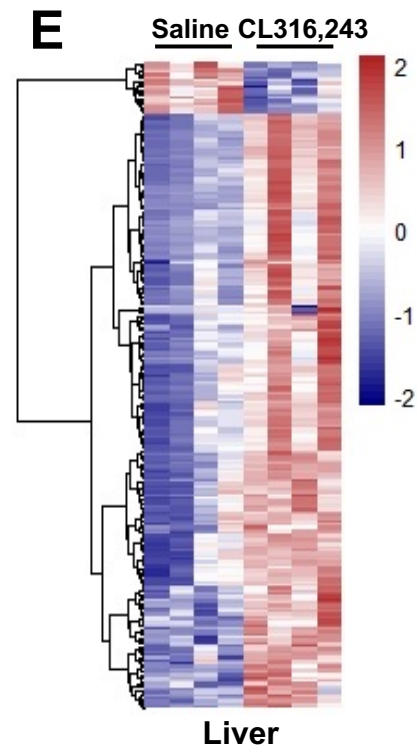

Supplement: mmc2.pdf [file mmc2.pdf]
