# Supplementary material for: Acute activation of adipocyte lipolysis reveals dynamic lipid remodeling of the hepatic lipidome
Source: PubMed Central journal article supplement (PMC10839691; doi:10.1016/j.jlr.2023.100434), 2023-08-26

# Supplement Figure 3. Time Course for Serum and liver after CL Administration.

## A Serum Lipids

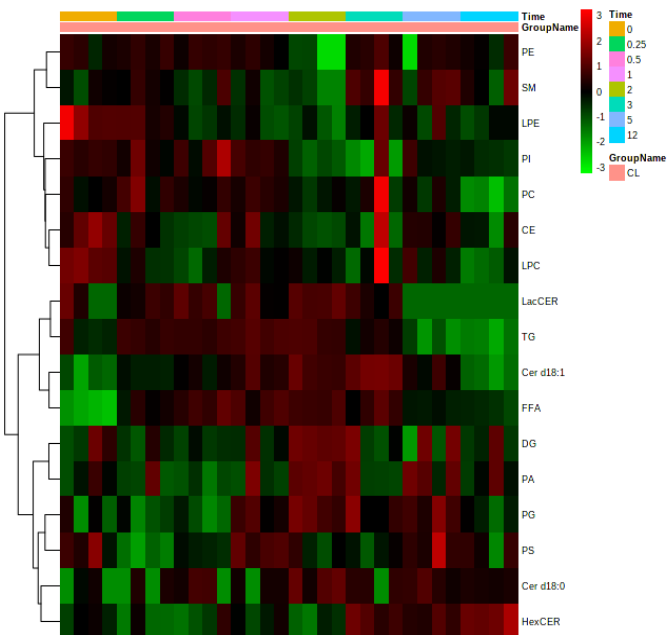

## B Liver Lipids

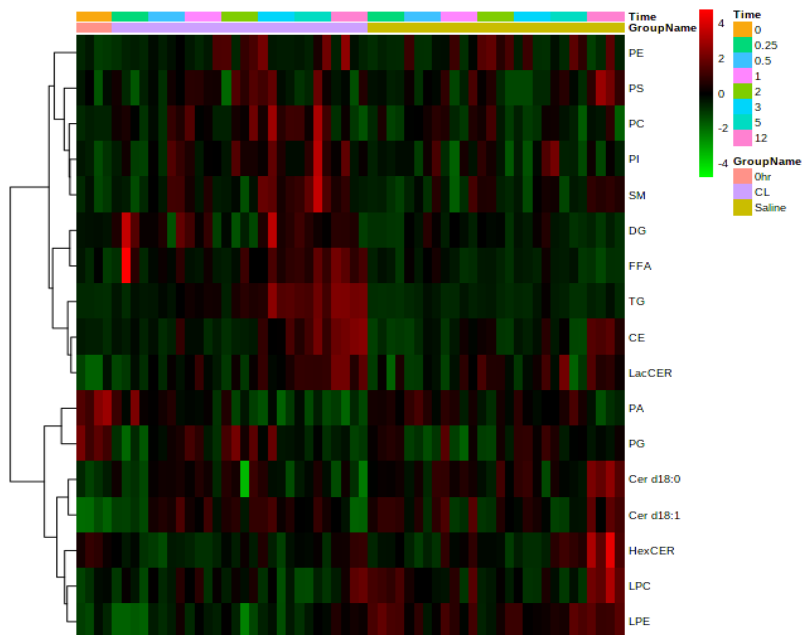

Supplement: mmc3.pdf [file mmc3.pdf]
