# Supplementary material for: Acute activation of adipocyte lipolysis reveals dynamic lipid remodeling of the hepatic lipidome
Source: PubMed Central journal article supplement (PMC10839691; doi:10.1016/j.jlr.2023.100434), 2023-08-26

**Supplement Figure 4. Dietary palmitate and linoleate utilization in response to activation of lipolysis.**

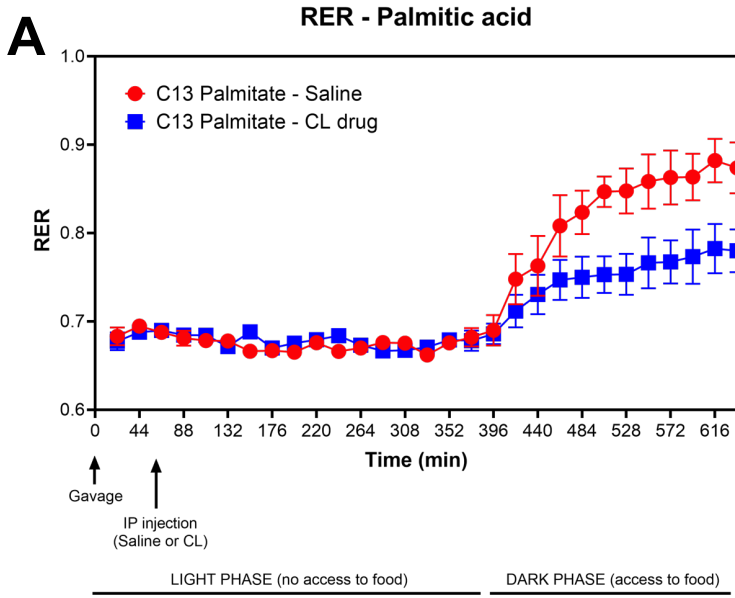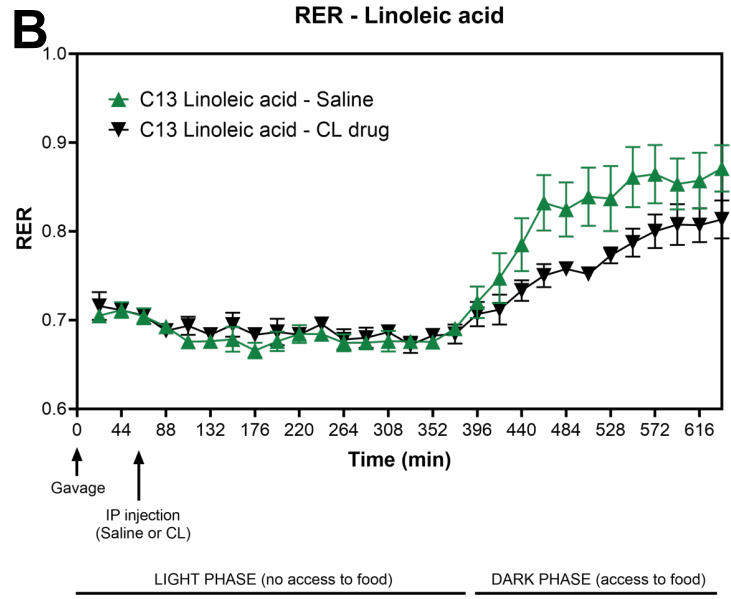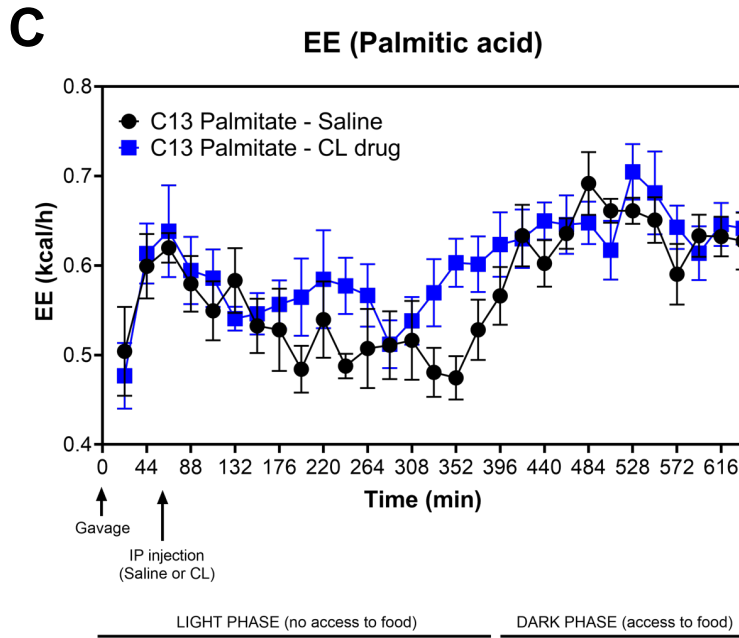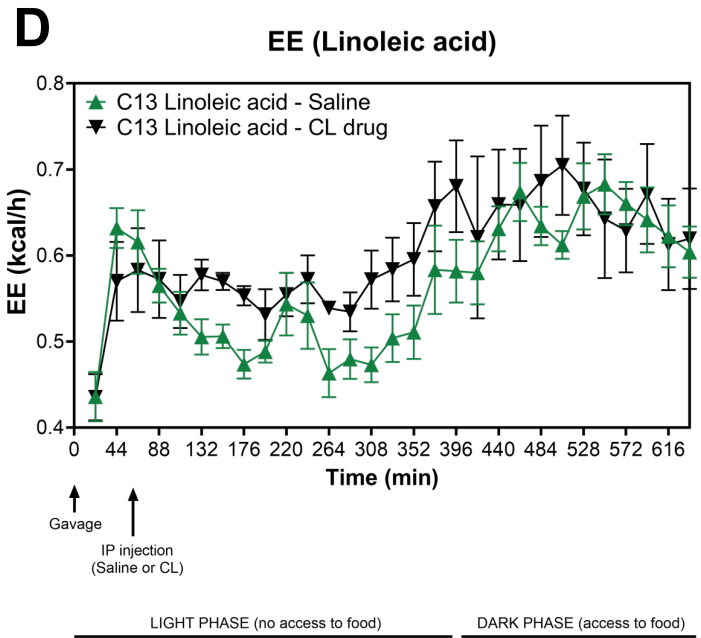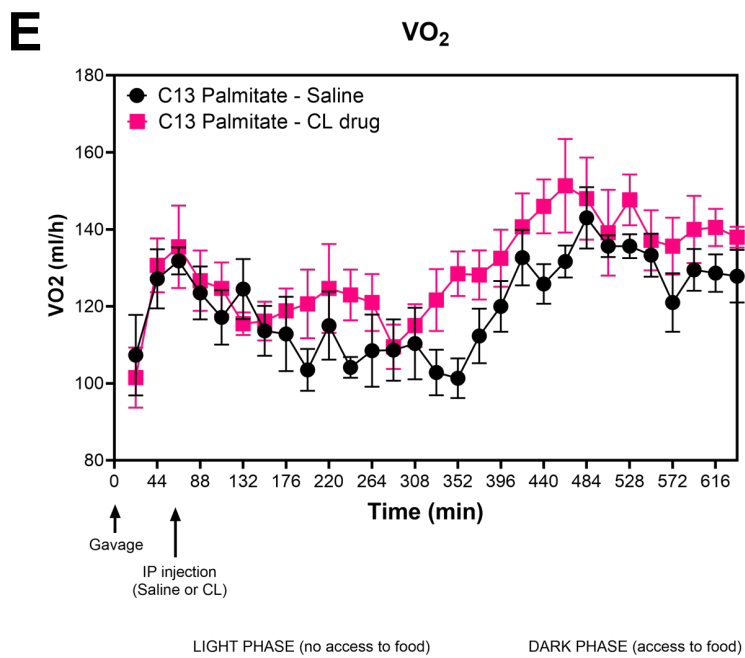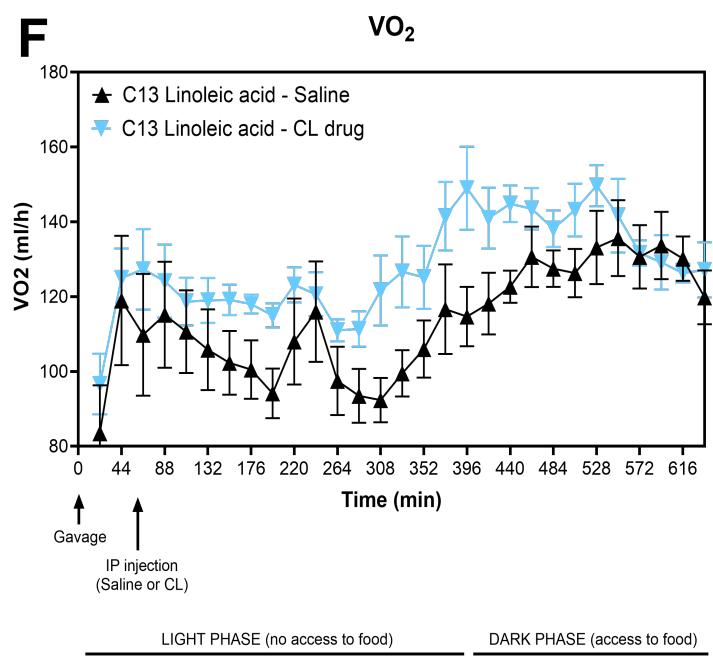

Supplement: mmc4.pdf [file mmc4.pdf]
