# Supplementary material for: Acute activation of adipocyte lipolysis reveals dynamic lipid remodeling of the hepatic lipidome
Source: PubMed Central journal article supplement (PMC10839691; doi:10.1016/j.jlr.2023.100434), 2023-08-26
Supplement: mmc5.pdf [file mmc5.pdf]

Supplement Figure 5. Significantly changed lipids, Overlapped between *Pnpla2<sup>F/F</sup>* mice and *Pnpla2<sup>F/F</sup>::Adipoq<sup>CRE</sup>* mice.

**A**

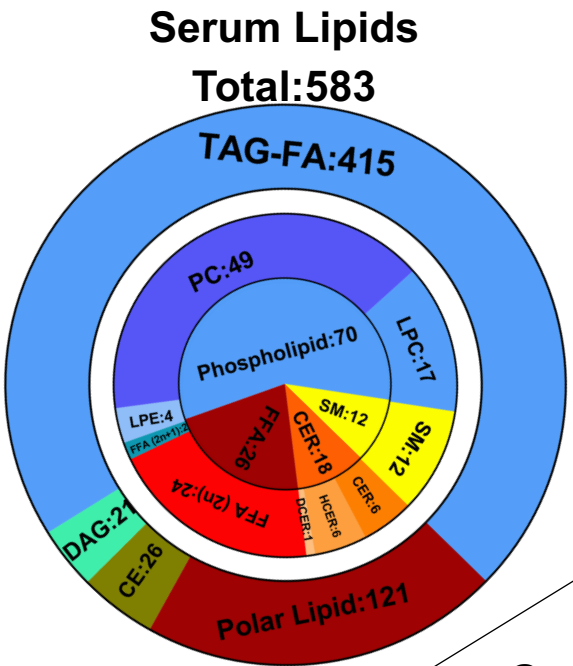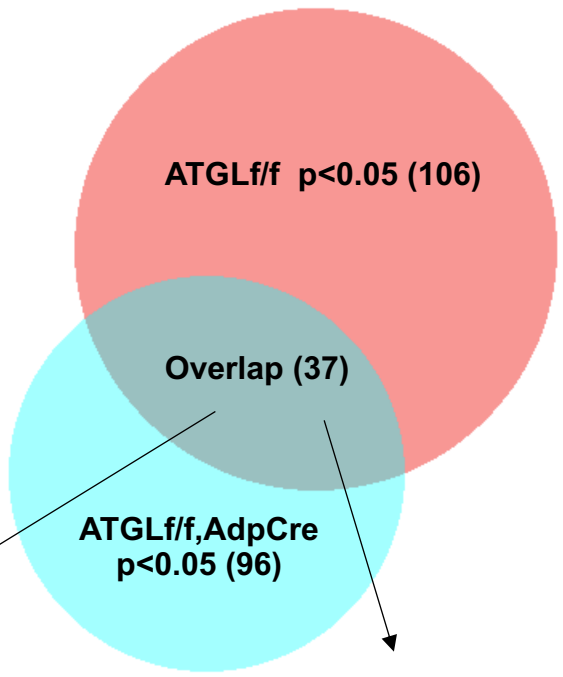

**B**

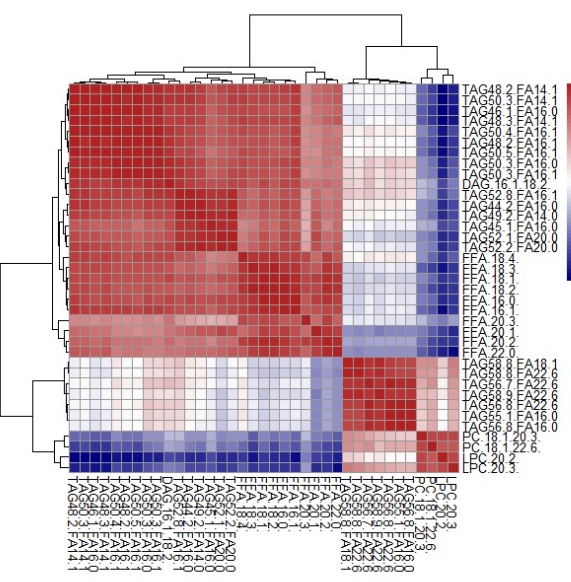

**C**

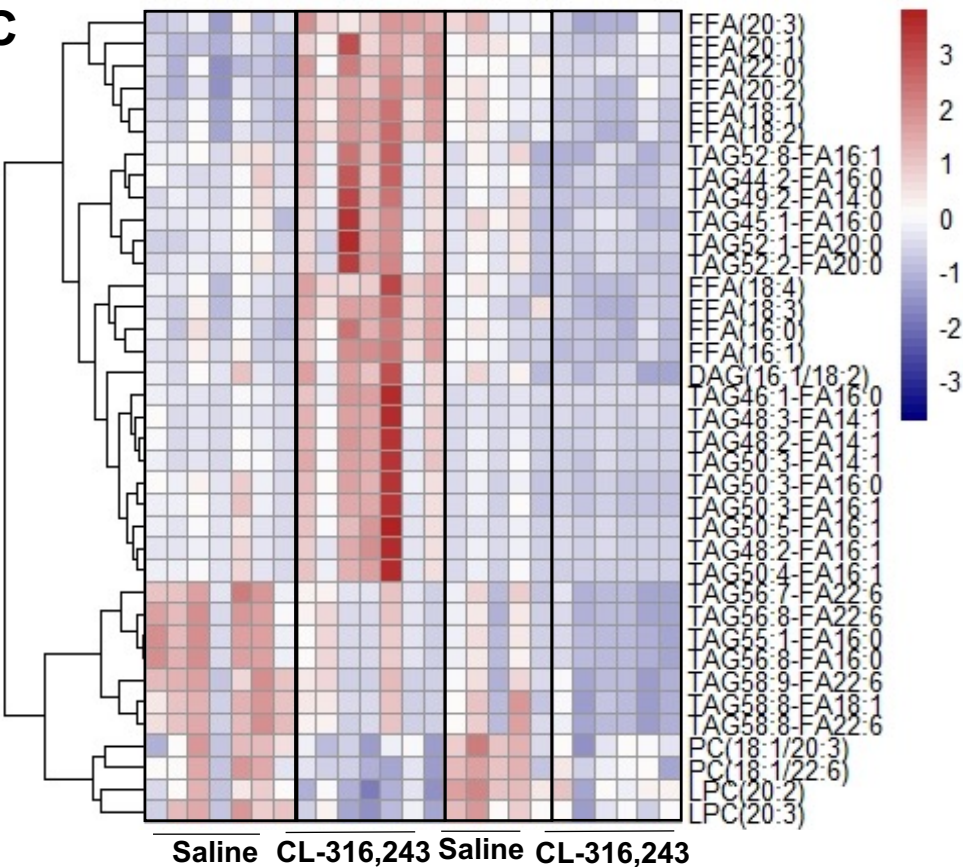

Supplement Figure 5. Significantly changed lipids, Overlapped between *Pnpla2<sup>F/F</sup>* mice and *Pnpla2<sup>F/F</sup>::Adipoq<sup>CRE</sup>* mice.

# Liver Lipids

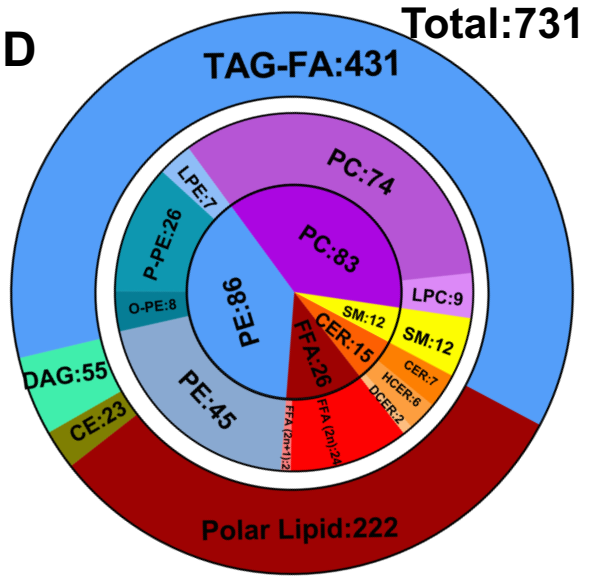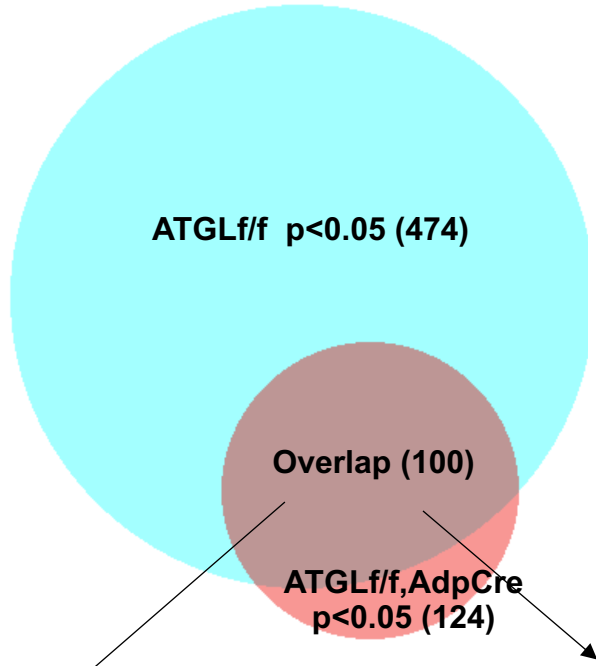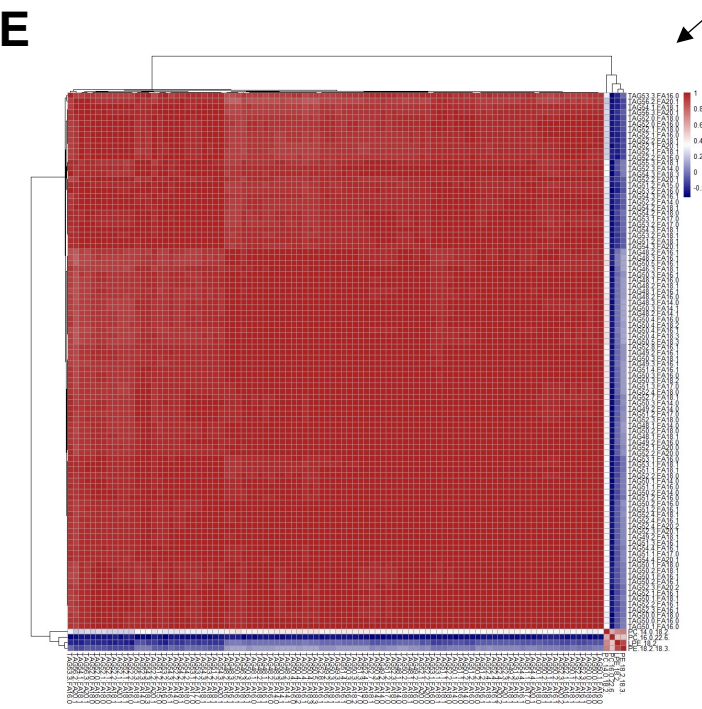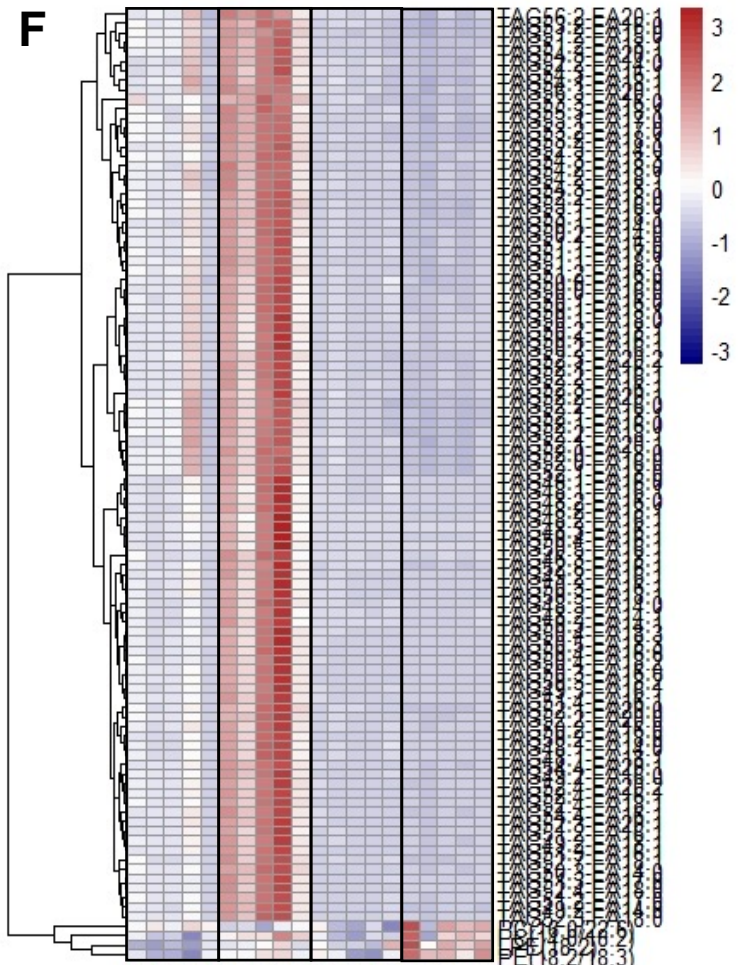

Saline CL-316,243      SalineCL-316,243  
*Pnpla2<sup>F/F</sup>*      *Pnpla2<sup>F/F</sup>::Adipoq<sup>CRE</sup>*  
 Fasted- 5hours
