# Supplementary material for: Acute activation of adipocyte lipolysis reveals dynamic lipid remodeling of the hepatic lipidome
Source: PubMed Central journal article supplement (PMC10839691; doi:10.1016/j.jlr.2023.100434), 2023-08-26

**Supplement Figure 6. The concentration of specific lipid species in the serum after 5hrs CL administration by LC-MS**

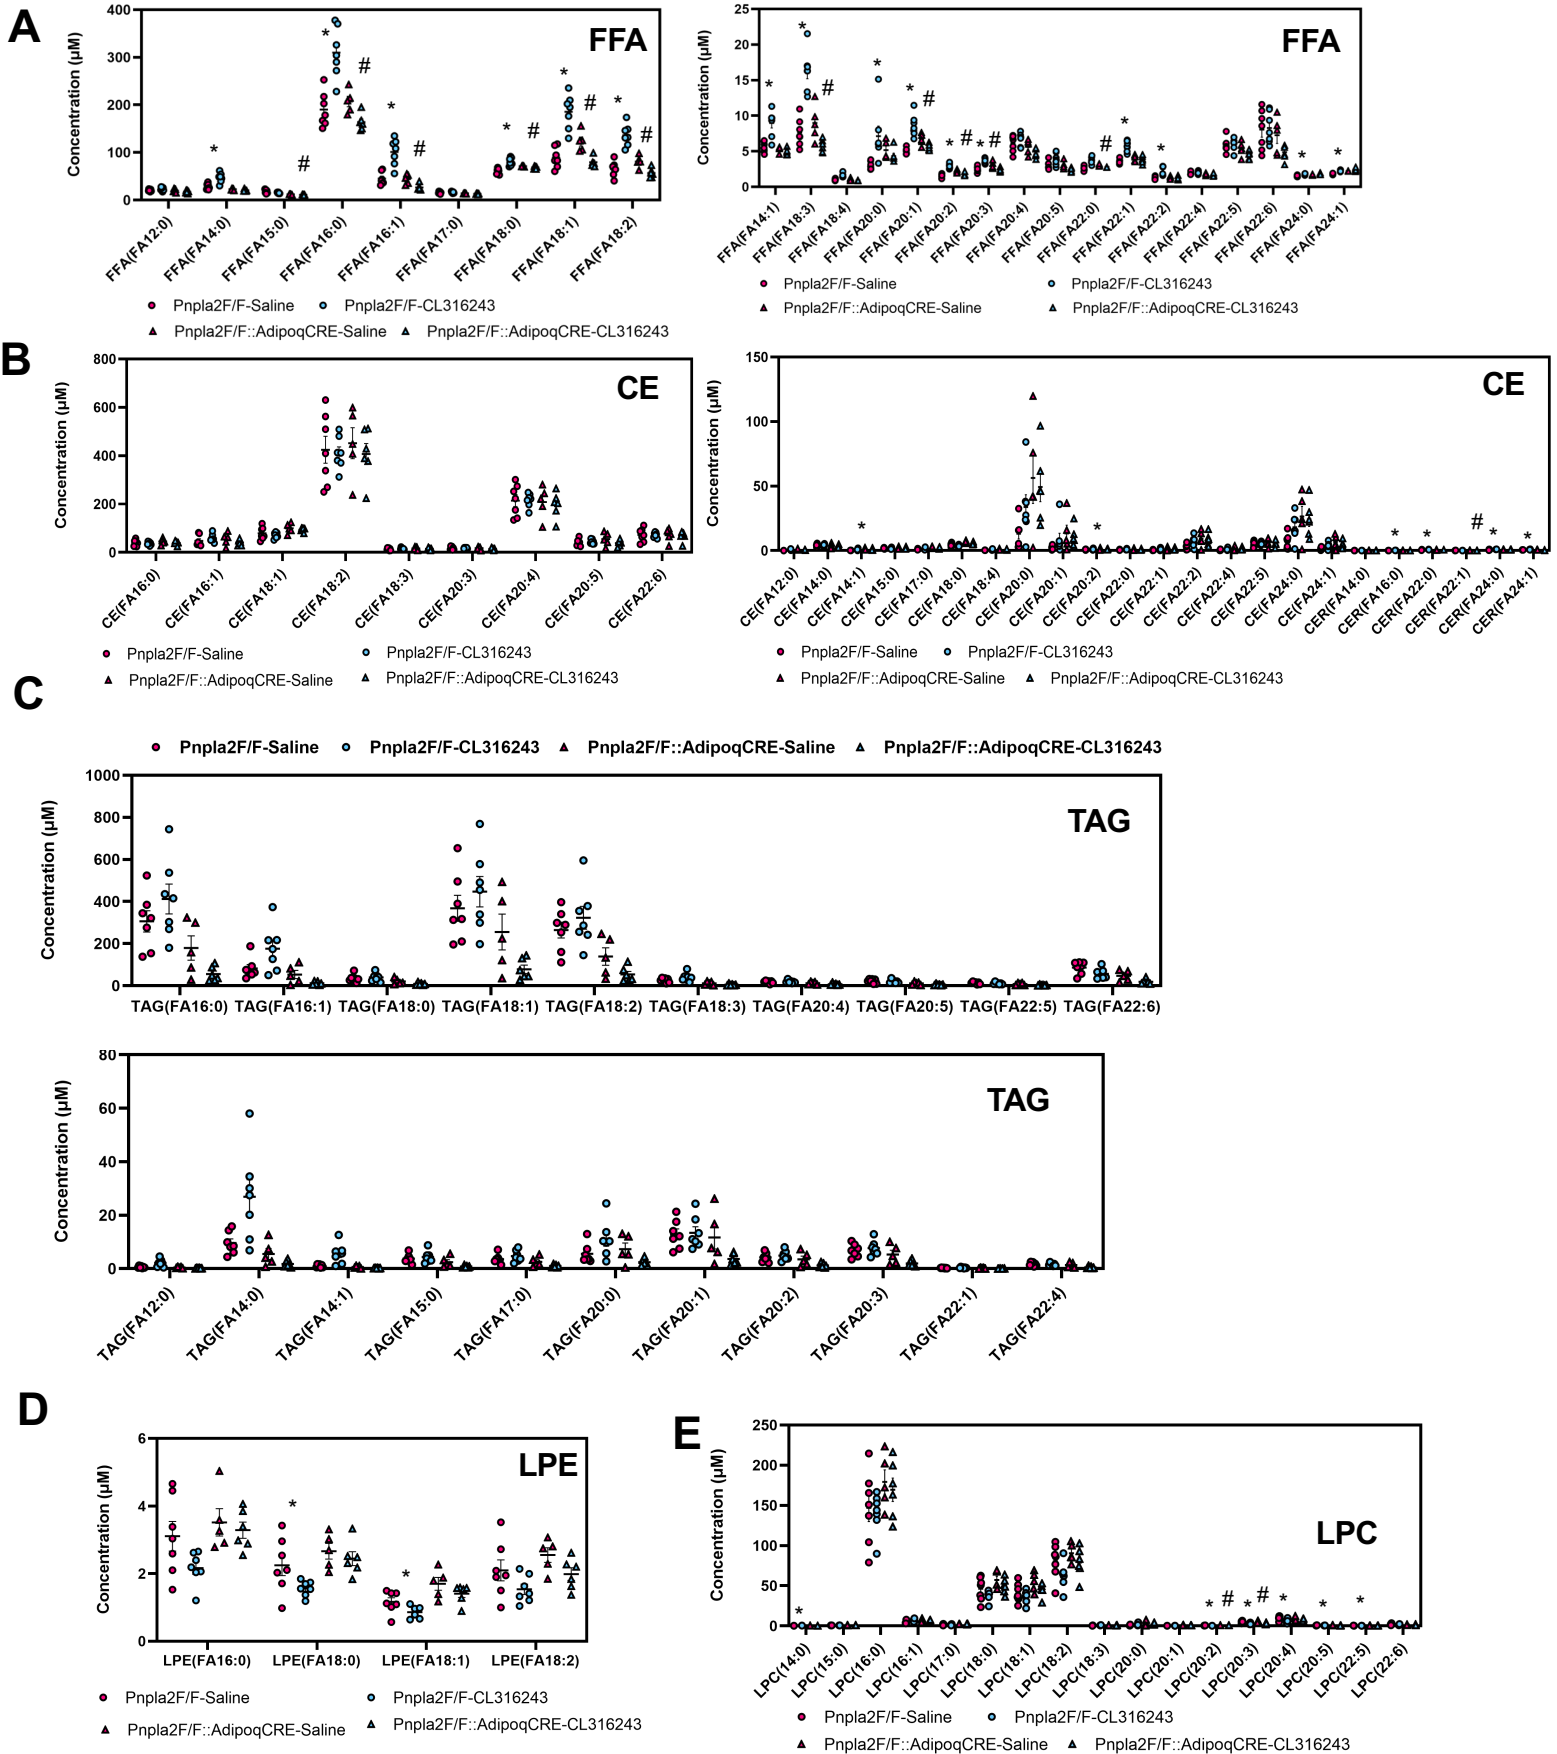

**Supplement Figure 6. The concentration of specific lipid species in the serum after 5hrs CL administration by LC-MS**

**F**

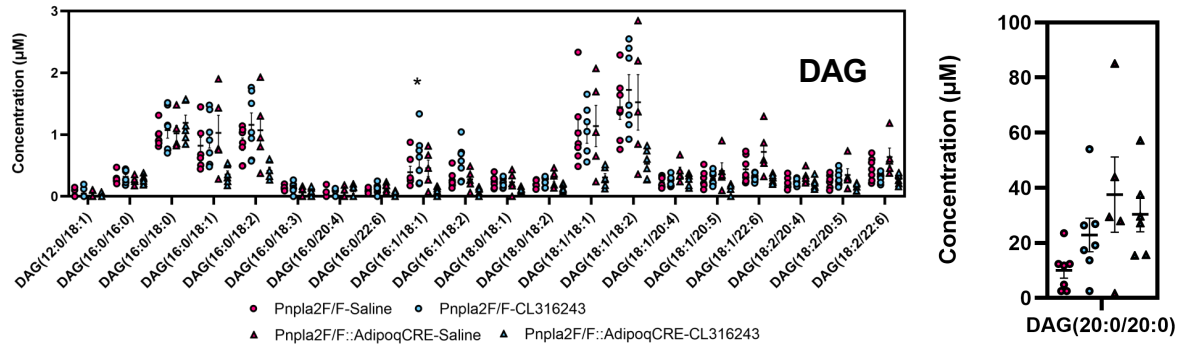

**G**

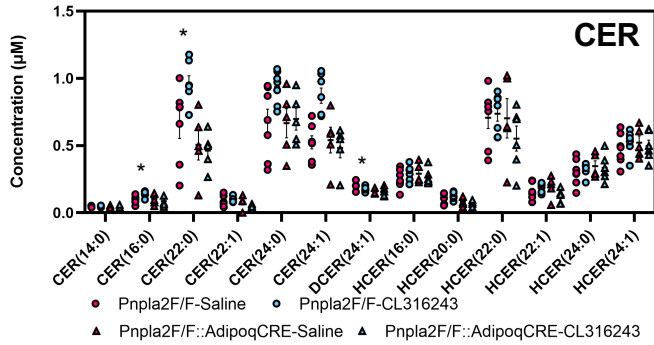

**H**

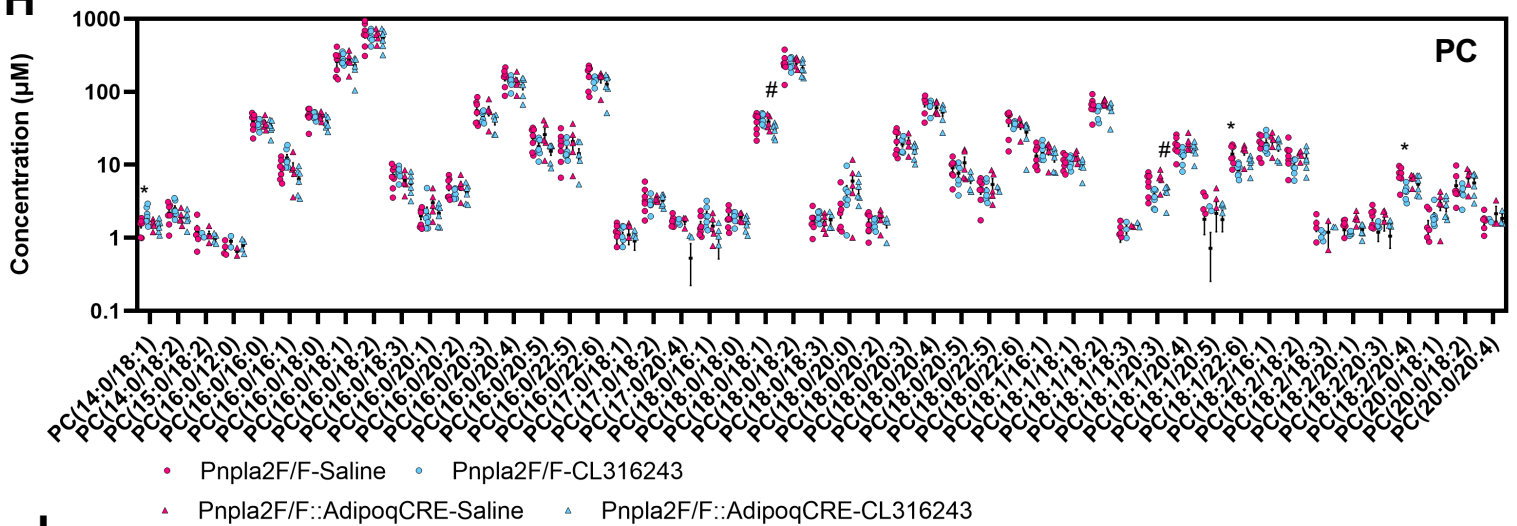

**I**

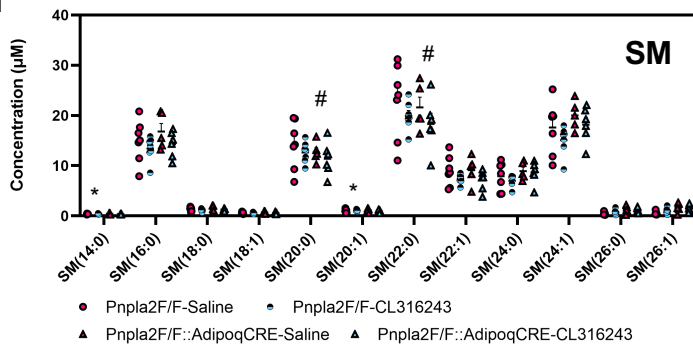

Supplement: mmc6.pdf [file mmc6.pdf]
