# Supplementary material for: Acute activation of adipocyte lipolysis reveals dynamic lipid remodeling of the hepatic lipidome
Source: PubMed Central journal article supplement (PMC10839691; doi:10.1016/j.jlr.2023.100434), 2023-08-26

Supplement Figure 8. Untargeted lipidomic analysis and Condition medium metabolites.

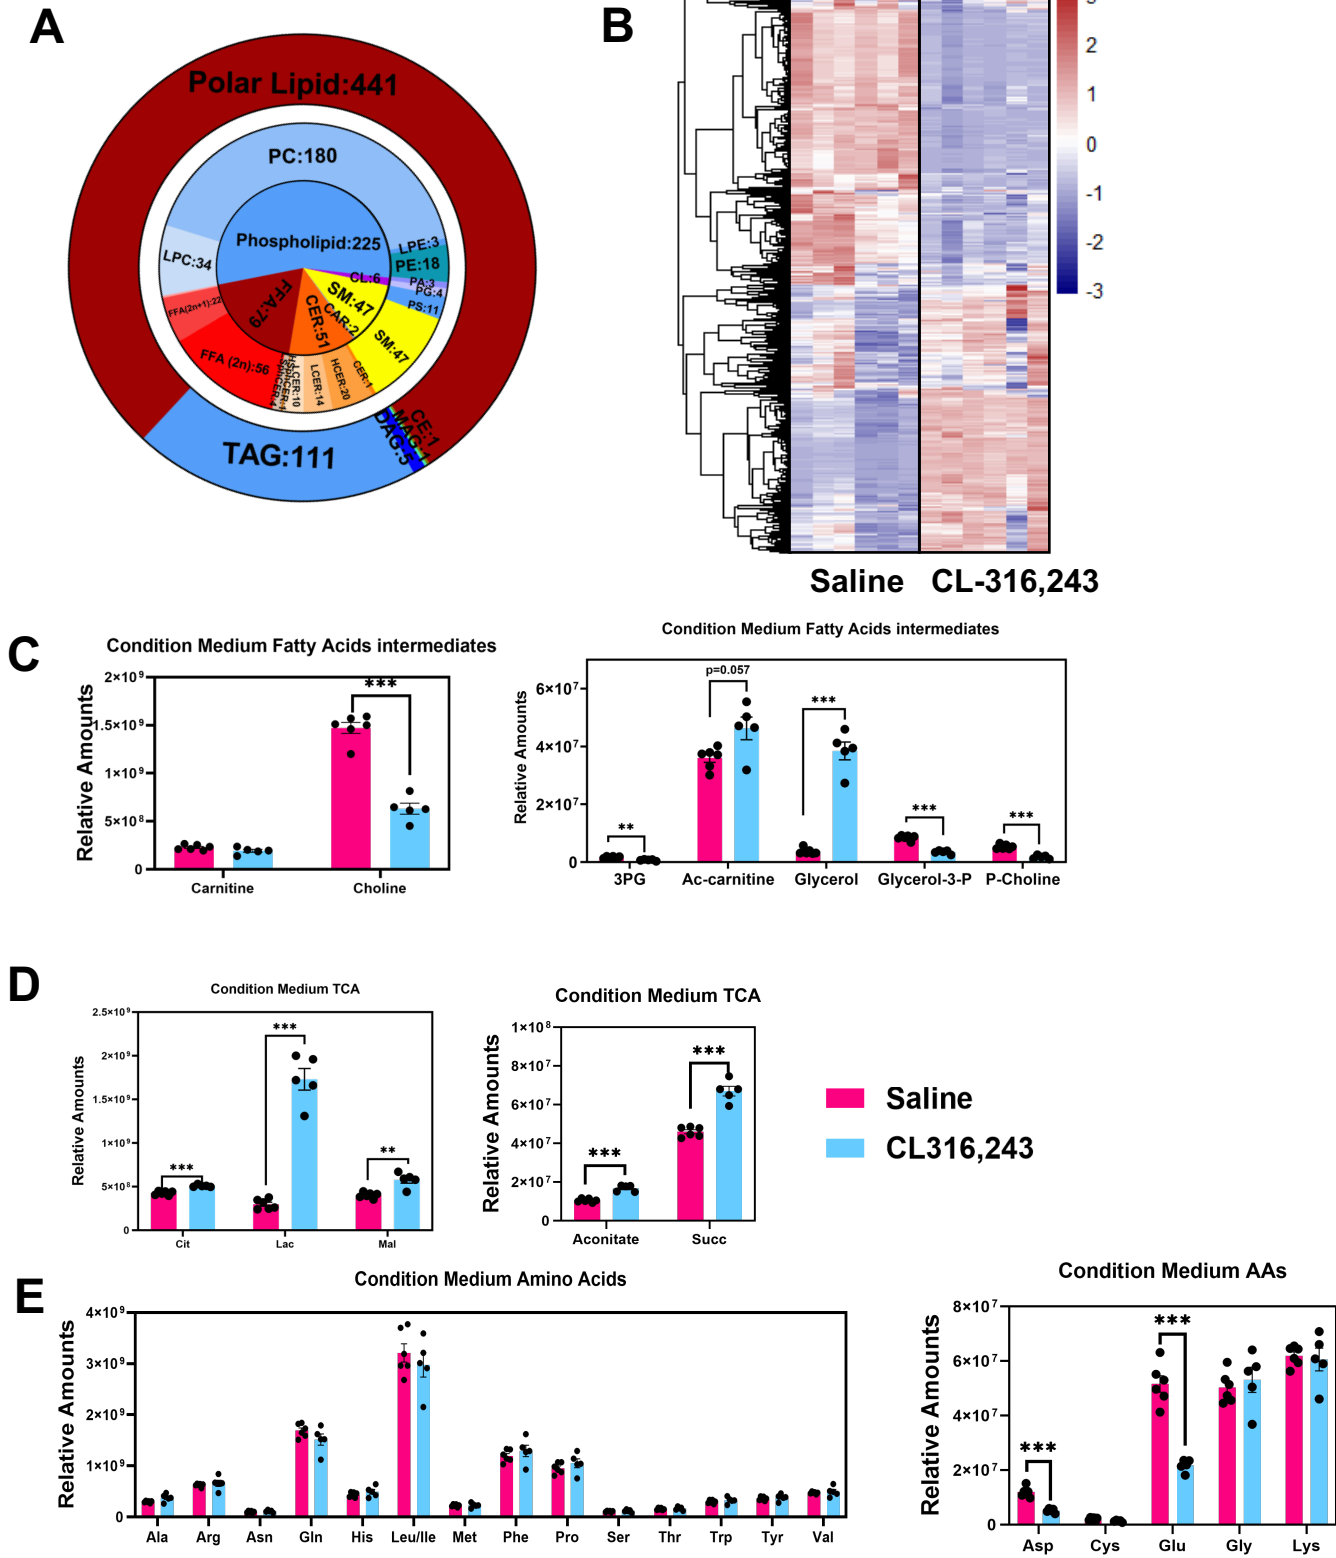

Supplement: mmc8.pdf [file mmc8.pdf]
