# Supplementary material for: Acute activation of adipocyte lipolysis reveals dynamic lipid remodeling of the hepatic lipidome
Source: PubMed Central journal article supplement (PMC10839691; doi:10.1016/j.jlr.2023.100434), 2023-08-26

**Supplement Figure 9. The concentration of specific lipid species in the condition medium after vehicle or CL administration by LC-MS.**

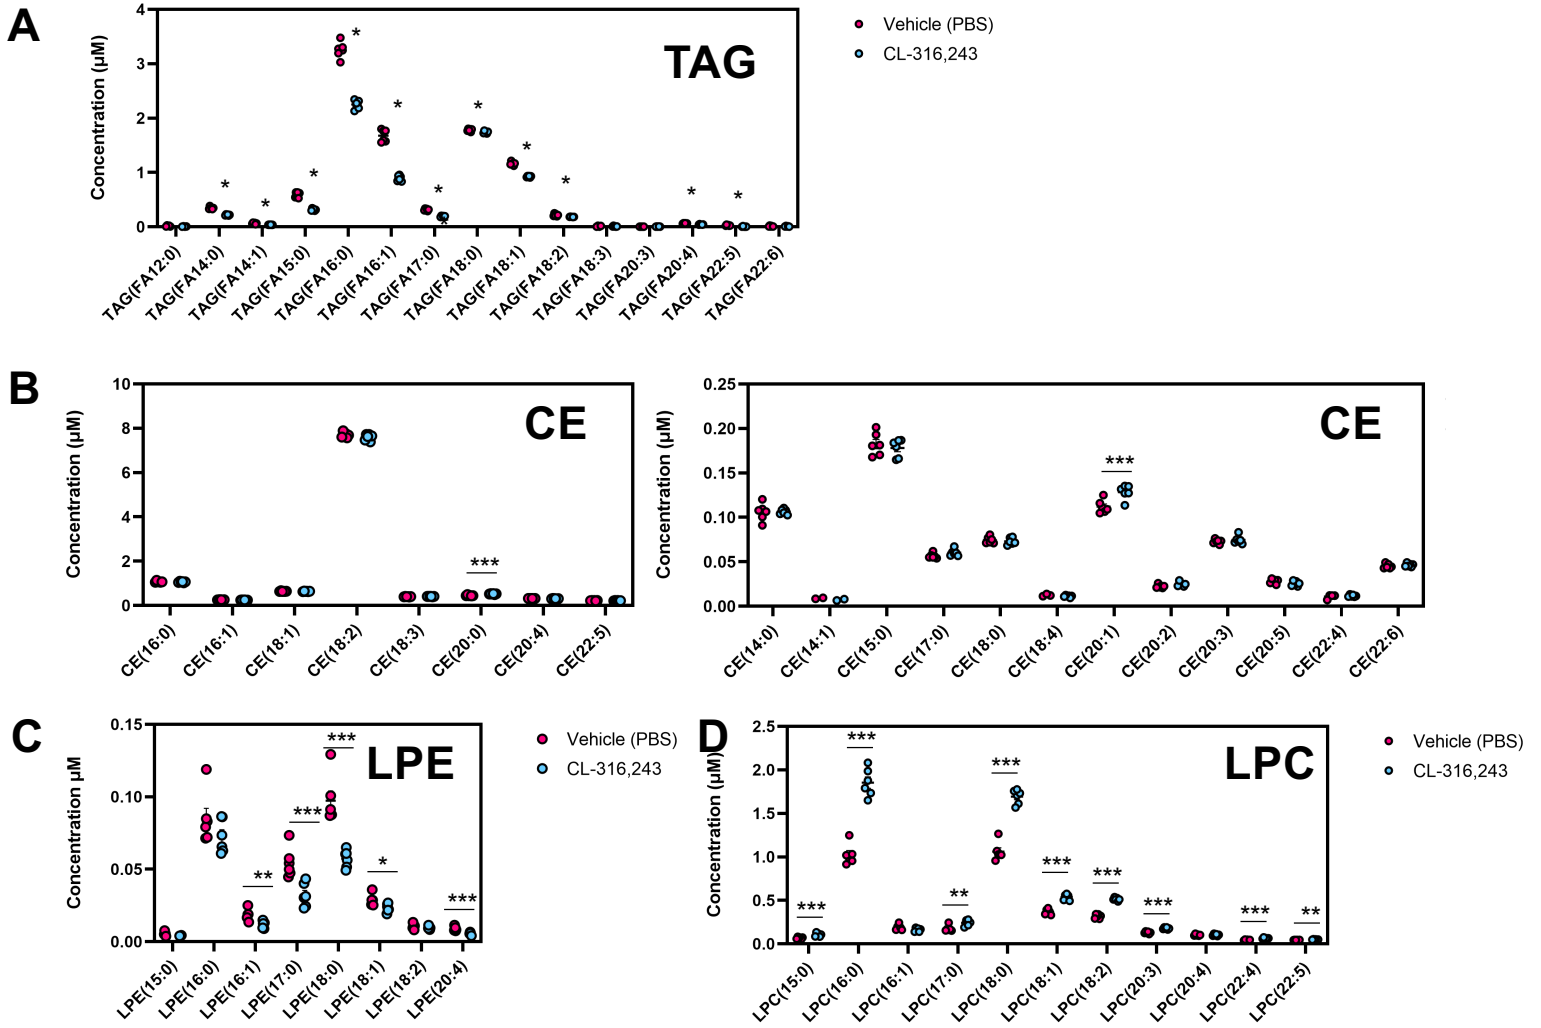

Supplement: mmc9.pdf [file mmc9.pdf]
