# Supplementary material for: Acute activation of adipocyte lipolysis reveals dynamic lipid remodeling of the hepatic lipidome
Source: PubMed Central journal article supplement (PMC10839691; doi:10.1016/j.jlr.2023.100434), 2023-08-26

# Supplement Figure 10. The concentration of specific lipid species in hepatocytes after condition medium treatment

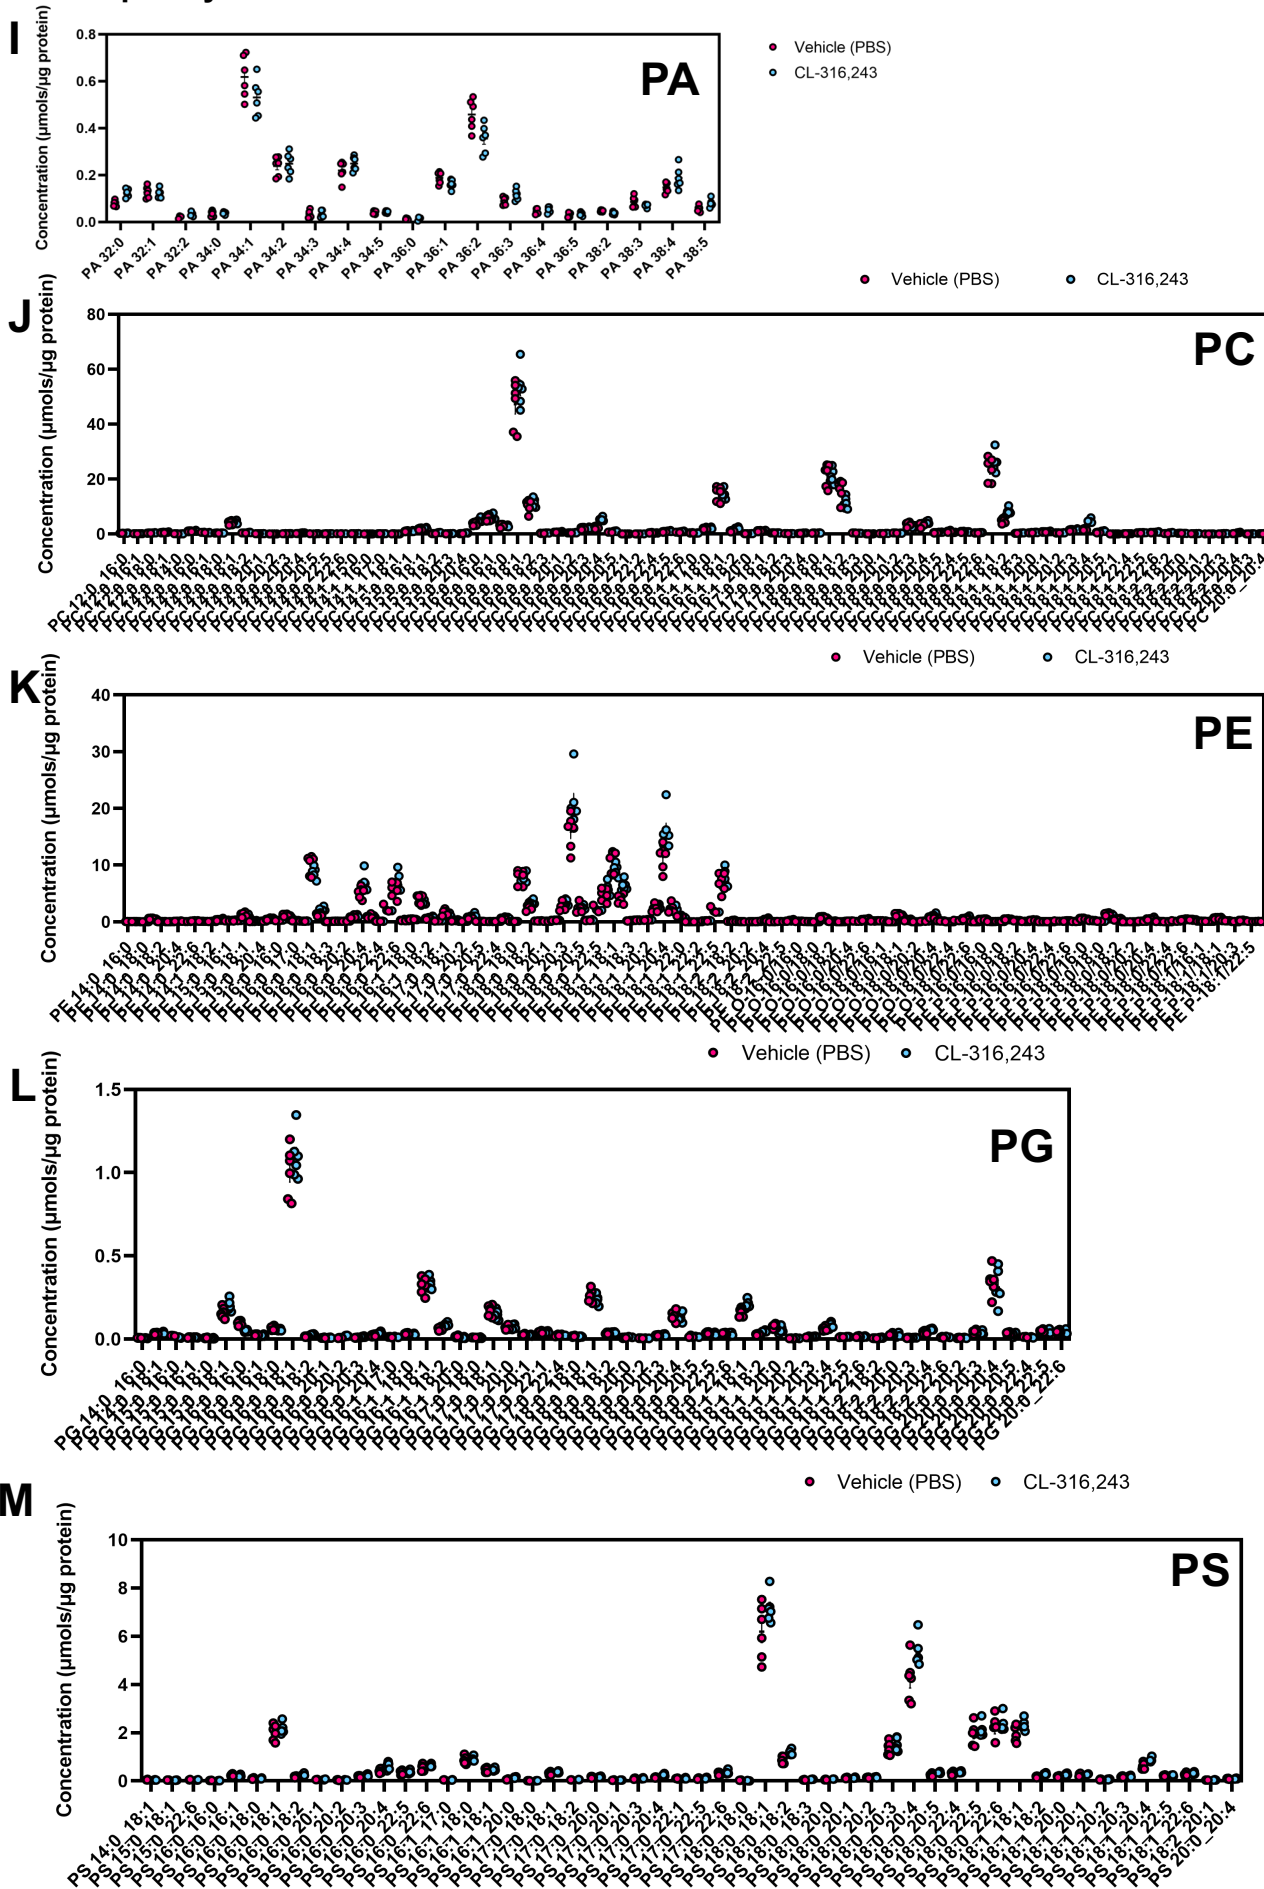

Supplement: mmc10.pdf [file mmc10.pdf]
